# Supplementary material
Source: publisher figshare collection journal article supplement (https://wiley.figshare.com/ndownloader/files/9194989)
Supplement: Supplementary file 1 [file 9194989]

## Sheet: Peptide Library Scores SecA-N68
Array	Peptide	Binding Strength	RSI	Sequence	Charge	Hydrophobicity	Protein
1	73	14.8124	1	SAGINAASPNKELAK	1	-0.43	MBP
2	107	19.2942	1	FIRSMKPRFVKRGAR	6	-0.71	FhuD
1	97	14.3785	0.969895	TVDEALKDAQTRITK	0	0.18	MBP
1	26	14.0173	0.944838	LLAEITPDKAFQDKL	-1	-0.12	MBP
1	244	13.2129	0.889035	TIEKQLARTQRDKKR	4	-2.03	AroK
1	152	13.0994	0.88116	LKSDVLFNFNKATLK	2	-0.05	proOmpA
1	169	12.6491	0.849922	LISKGIPADKISARG	2	0.07	proOmpA
1	72	11.6163	0.77827	VGVLSAGINAASPNK	1	0.48	MBP
1	40	11.5891	0.776385	EIPALDKELKAKGKS	1	-0.88	MBP
2	139	14.2745	0.743061	LVVSTLNNPFFVSLK	1	0.99	RbsA
2	240	14.1337	0.735851	MKKLKLHGFNNLTKS	4.3	-0.77	SpeD
1	80	10.8822	0.727343	EAVNKDKPLGAVALK	1	-0.19	MBP
2	38	13.4317	0.699918	FEQAMQTRVFQPLKL	1	-0.24	AmpC
2	352	13.25	0.690618	TAEHTQSVLKGFNKF	1.3	-0.58	LamB
2	189	13.1875	0.68742	KVQAKYPVDLKLVVK	3	0.05	RbsA
1	120	10.282	0.685703	ENGAYKAQGVQLTAK	1	-0.75	proOmpA
1	4	9.52829	0.633414	SALTTMMFSASALAK	1	0.91	MBP
1	41	9.22068	0.612074	LDKELKAKGKSALMF	2	-0.27	MBP
1	11	8.99227	0.596228	KGYNGLAEVGKKFEK	2	-1.07	MBP
2	106	11.4055	0.596208	AQYEDFIRSMKPRFV	1	-0.61	FhuD
1	149	8.90037	0.589852	APAPEVQTKHFTLKS	1.3	-0.6	proOmpA
2	327	11.2621	0.588865	LIEWLPGSTIWAGKR	1	0.05	LamB
1	68	8.6515	0.572587	GVTVLPTFKGQPSKP	2	-0.27	MBP
2	157	10.841	0.56731	EVVSHIASDNVLGGK	-0.7	0.18	RbsA
1	187	8.45898	0.55923	ISFEAPNAPHVFQKD	-0.7	-0.48	SecB
2	154	10.6608	0.558087	ANIPVITLDRQATKG	1	-0.11	RbsA
1	54	8.41106	0.555907	GAKAGLTFLVDLIKN	1	0.68	MBP
1	121	8.37106	0.553131	YKAQGVQLTAKLGYP	2	-0.34	proOmpA
1	151	8.36432	0.552663	KHFTLKSDVLFNFNK	2.3	-0.45	proOmpA
1	157	8.25865	0.545333	ALDQLYSQLSNLDPK	-1	-0.59	proOmpA
1	173	8.22506	0.543003	GESNPVTGNTCDNVK	-1	-1.01	proOmpA
2	335	10.2676	0.537961	NIDVGFGKLSLAATR	1	0.33	LamB
1	98	8.1473	0.537608	MKKTAIAIAVALAGF	2	1.45	proOmpA
1	236	8.10246	0.534497	QGIVLATGGGSVKSR	2	0.18	AroK
1	254	8.09229	0.533792	EIADVTIRTDDQSAK	-2	-0.75	AroK
2	187	10.0065	0.524595	ETADKVLKGEKVQAK	1	-0.99	RbsA
2	147	9.79538	0.51379	ELANVQDLTVRGTKI	0	-0.13	RbsA
1	51	7.80224	0.513669	KYDIKDVGVDNAGAK	0	-0.75	MBP
2	140	9.75887	0.511921	LNNPFFVSLKDGAQK	1	-0.36	RbsA
2	61	9.66181	0.506952	NGSDNKIALAARPVK	2	-0.51	AmpC
1	153	7.70346	0.506817	VLFNFNKATLKPEGQ	1	-0.35	proOmpA
2	239	9.54155	0.500797	SRRERSLRRLEQRKN	5	-2.59	PdhR
1	219	7.48239	0.49148	NIFLVGPMGAGKSTI	1	0.79	AroK
1	67	7.43558	0.488232	KVNYGVTVLPTFKGQ	2	-0.05	MBP
1	255	7.29544	0.47851	VTIRTDDQSAKVVAN	0	-0.26	AroK
2	202	8.9976	0.472954	QRLEAKGLLLRRQGG	3	-0.81	PdhR
1	25	7.21007	0.472588	AQSGLLAEITPDKAF	-1	0.16	MBP
1	27	7.10682	0.465425	ITPDKAFQDKLYPFT	0	-0.57	MBP
1	69	7.0671	0.462669	LPTFKGQPSKPFVGV	2	-0.04	MBP
1	183	7.02384	0.459668	NNTEMTFQIQRIYTK	1	-1.04	SecB
2	75	8.68708	0.45706	MSGLPLISRRRLLTA	3	0.37	FhuD
1	179	6.96127	0.455327	APDRRVEIEVKGIKD	0	-0.91	proOmpA
1	55	6.94087	0.453912	GLTFLVDLIKNKHMN	1.3	0.15	MBP
1	13	6.82775	0.446064	VGKKFEKDTGIKVTV	2	-0.33	MBP
2	313	8.46418	0.44565	QCFQTTGAQSKYRLG	2	-0.82	LamB
1	78	6.7074	0.437715	YLLTDEGLEAVNKDK	-2	-0.69	MBP
2	375	8.29345	0.436911	VESQRTGDKNNQYKI	1	-1.85	LamB
2	159	8.25974	0.435185	VLGGKIAGDYIAKKA	2	0.31	RbsA
1	220	6.66402	0.434705	VGPMGAGKSTIGRQL	2	-0.03	AroK
2	328	8.15129	0.429635	PGSTIWAGKRFYQRH	3.3	-1.11	LamB
1	128	6.54502	0.426449	MVWRADTKSNVYGKN	2	-0.99	proOmpA
2	160	7.95502	0.419588	IAGDYIAKKAGEGAK	1	-0.33	RbsA
2	243	7.91679	0.417631	TKSLSFCIYDICYAK	1	0.41	SpeD
1	52	6.33614	0.411958	KDVGVDNAGAKAGLT	0	-0.17	MBP
2	334	7.72008	0.407563	GAGLENIDVGFGKLS	-1	0.27	LamB
2	273	7.62667	0.402781	ADIEVSTCGVISPLK	-1	0.69	SpeD
2	369	7.61078	0.401968	NGTKWWTVGIRPMYK	3	-0.81	LamB
1	245	6.10027	0.395595	QLARTQRDKKRPLLH	4.3	-1.61	AroK
2	125	7.3009	0.386106	ATPLWQAMPFVRAGR	2	0.03	FhuD
1	12	5.93511	0.384137	GLAEVGKKFEKDTGI	0	-0.47	MBP
2	49	7.22016	0.381973	STIEDMARWVQSNLK	0	-0.63	AmpC
2	281	7.21758	0.381841	YRVRGFTRDINGMKH	3.3	-1.13	SpeD
1	42	5.59794	0.360746	LKAKGKSALMFNLQE	2	-0.25	MBP
2	53	6.77435	0.359154	EKTLQQGIQLAQSRY	1	-1.01	AmpC
2	201	6.76447	0.358648	LREAIQRLEAKGLLL	1	0.22	PdhR
2	131	6.75395	0.358109	AMHFVRVLDNAIGGK	1.3	0.37	FhuD
1	39	5.47878	0.352479	KTWEEIPALDKELKA	-1	-0.88	MBP
1	74	5.4423	0.349948	NAASPNKELAKEFLE	-1	-0.79	MBP
1	30	5.426	0.348818	PFTWDAVRYNGKLIA	1	-0.09	MBP
2	229	6.56647	0.348513	RREMLPLVSSHRTRI	3.3	-0.69	PdhR
1	79	5.41544	0.348085	DEGLEAVNKDKPLGA	-2	-0.82	MBP
1	49	5.39517	0.346679	YAFKYENGKYDIKDV	0	-1.11	MBP
1	1	5.34028	0.342871	MKIKTGARILALSAL	3	0.9	MBP
1	148	5.31886	0.341385	APAPAPAPEVQTKHF	0.3	-0.47	proOmpA
2	169	6.4168	0.340852	VLASQPADFDRIKGL	0	0.07	RbsA
2	39	6.39768	0.339874	QTRVFQPLKLNHTWI	2.3	-0.46	AmpC
1	168	5.11895	0.327516	VVDYLISKGIPADKI	0	0.57	proOmpA
2	126	6.12131	0.325727	QAMPFVRAGRFQRVP	3	-0.31	FhuD
1	50	5.00195	0.319399	YENGKYDIKDVGVDN	-2	-1.29	MBP
1	16	4.99786	0.319115	VTVEHPDKLEEKfPQ	-1.7	-1.16	MBP
1	118	4.95654	0.316249	RMPYKGSVENGAYKA	2	-1.03	proOmpA
2	190	5.74851	0.306645	VQAKYPVDLKLVVKQ	2	0.07	RbsA
2	34	5.72317	0.305348	YANSSIGLFGALAVK	1	0.89	AmpC
2	181	5.64801	0.3015	GTPDGEKAVNDGKLA	-1	-0.91	RbsA
1	242	4.72243	0.300007	GVVVYLETTIEKQLA	-1	0.6	AroK
2	274	5.52453	0.29518	VSTCGVISPLKALNY	1	0.79	SpeD
1	174	4.65127	0.29507	PVTGNTCDNVKQRAA	1	-0.75	proOmpA
1	119	4.60939	0.292165	KGSVENGAYKAQGVQ	1	-0.87	proOmpA
1	65	4.60025	0.291531	AWSNIDTSKVNYGVT	0	-0.35	MBP
2	241	5.41222	0.289431	KLHGFNNLTKSLSFC	2.3	-0.08	SpeD
2	42	5.34457	0.285969	NVPPAEEKNYAWGYR	0	-1.45	AmpC
1	48	4.44643	0.28086	ADGGYAFKYENGKYD	-1	-1.37	MBP
1	181	4.41219	0.278485	IEVKGIKDVVTQPQA	0	-1.15	proOmpA
1	150	4.39526	0.27731	EVQTKHFTLKSDVLF	0.3	-0.14	proOmpA
2	15	5.01258	0.268975	TQQTLFELGSVSKTF	0	-0.07	AmpC
2	31	4.96512	0.266546	YQNWQPAWAPGTQRL	1	-1.23	AmpC
1	64	4.23058	0.265885	NGPWAWSNIDTSKVN	0	-0.9	MBP
2	286	4.94386	0.265458	INSIQNFMSDDMKAL	-1	-0.12	SpeD
2	280	4.8367	0.259973	VTIDYRVRGFTRDIN	1	-0.46	SpeD
2	291	4.8337	0.259819	VNVYQENIFHTKMLL	0.3	0.14	SpeD
1	116	4.12565	0.258606	EMGYDWLGRMPYKGS	0	-0.99	proOmpA
2	96	4.75231	0.255653	YGPSPEMLARIAPGR	1	-0.43	FhuD
2	380	4.74737	0.2554	SIWSRPAIRVFATYA	2	0.42	LamB
2	35	4.73126	0.254575	IGLFGALAVKPSGLS	1	1.21	AmpC
2	329	4.69669	0.252806	WAGKRFYQRHDVHMI	2.6	-0.91	LamB
2	378	4.66169	0.251014	TLAQQWQAGDSIWSR	0	-0.74	LamB
1	101	4.01478	0.250914	AGFATVAQAAPKDNT	0	-0.12	proOmpA
2	238	4.61101	0.24842	SREESRRERSLRRLE	2	-2.39	PdhR
1	56	3.97271	0.247995	LVDLIKNKHMNADTD	-0.7	-0.61	MBP
2	43	4.53692	0.244628	EEKNYAWGYREGKAV	0	-1.52	AmpC
2	260	4.51373	0.243441	LVSEEPVDPKLIDKT	-2	-0.4	SpeD
2	279	4.50621	0.243056	ESDIVTIDYRVRGFT	-1	-0.21	SpeD
2	108	4.49032	0.242242	KPRFVKRGARPLLLT	5	-0.36	FhuD
2	184	4.44887	0.240121	ATIAQLPDQIGAKGV	0	0.33	RbsA
2	191	4.37715	0.23645	MAYSKIRQPKLSDVI	2	-0.21	PdhR
1	167	3.80289	0.236214	RAQSVVDYLISKGIP	1	0.18	proOmpA
2	166	4.36985	0.236076	RGEGFQQAVAAHKFN	1.3	-0.75	RbsA
1	184	3.76443	0.233546	MTFQIQRIYTKDISF	1	-0.09	SecB
2	127	4.25303	0.230096	VRAGRFQRVPAVWFY	3	0.04	FhuD
2	324	4.2483	0.229854	ATDPAFREANVQGKN	0	-1.08	LamB
2	235	4.22554	0.228689	SHRHLAFIEEILLDR	-0.4	-0.11	PdhR
2	301	4.21222	0.228008	TAALWKEMREIYYGR	1	-0.71	SpeD
1	103	3.68065	0.227734	AAPKDNTWYTGAKLG	1	-0.77	proOmpA
1	10	3.67427	0.227291	INGDKGYNGLAEVGK	0	-0.69	MBP
2	381	4.19612	0.227183	PAIRVFATYAKWDEK	1	-0.46	LamB
2	99	4.16111	0.225392	GFNFSDGKQPLAMAR	1	-0.48	FhuD
2	188	4.12375	0.223479	VLKGEKVQAKYPVDL	1	-0.23	RbsA
2	63	4.08703	0.221599	ARPVKAITPPTPAVR	3	-0.16	AmpC
2	132	4.04129	0.219258	MHFVRVLDNAIGGKA	1.3	0.3	FhuD
1	233	3.55002	0.218672	REEKVINELTEKQGI	-1	-1.16	AroK
2	237	3.96699	0.215455	ILLDRSREESRRERS	1	-1.79	PdhR
2	65	3.94981	0.214575	TPAVRASWVHKTGAT	2.3	-0.24	AmpC
1	31	3.48643	0.21426	DAVRYNGKLIAYPIA	1	0.16	MBP
2	351	3.92468	0.213289	DGWLFTAEHTQSVLK	-0.7	-0.31	LamB
2	185	3.91223	0.212652	LPDQIGAKGVETADK	-1	-0.59	RbsA
2	95	3.91072	0.212575	VWSAGYGPSPEMLAR	0	-0.15	FhuD
2	141	3.90127	0.212091	FVSLKDGAQKEADKL	0	-0.58	RbsA
2	315	3.89054	0.211542	KYRLGNECETYAELK	0	-1.21	LamB
2	46	3.88603	0.211311	HVSPGALDAEAYGVK	-0.7	-0.07	AmpC
1	127	3.43964	0.211014	RLGGMVWRADTKSNV	2	-0.48	proOmpA
1	70	3.41184	0.209085	KGQPSKPFVGVLSAG	2	-0.03	MBP
1	38	3.38886	0.207491	PNPPKTWEEIPALDK	-1	-1.31	MBP
2	180	3.77049	0.205397	VVGFDGTPDGEKAVN	-2	-0.28	RbsA
1	239	3.35857	0.205389	KSRETRNRLSARGVV	4	-1.17	AroK
2	9	3.75739	0.204727	IPGMAVAVIYQGKPY	1	0.59	AmpC
2	151	3.70113	0.201847	TDSDAVGNAVKMANQ	-1	-0.51	RbsA
2	27	3.69426	0.201495	GGLPLQVPDEVKSSS	-1	-0.32	AmpC
2	144	3.6803	0.20078	GYNLVVLDSQNNPAK	0	-0.51	RbsA
2	287	3.67815	0.200671	QNFMSDDMKALYDMV	-2	-0.35	SpeD
1	36	3.28444	0.200247	LIYNKDLLPNPPKTW	1	-0.67	MBP
2	231	3.63757	0.198593	HRTRIFEAIMAGKPE	1.3	-0.57	PdhR
1	82	3.2602	0.198565	LGAVALKSYEEELAK	-1	0.01	MBP
1	34	3.25865	0.198458	PIAVEALSLIYNKDL	-1	0.67	MBP
2	233	3.61674	0.197527	AGKPEEAREASHRHL	0.6	-1.56	PdhR
2	275	3.57916	0.195603	GVISPLKALNYLIHQ	1.3	0.55	SpeD
1	235	3.20346	0.194629	LTEKQGIVLATGGGS	0	0.23	AroK
2	10	3.5128	0.192207	VAVIYQGKPYYFTWG	1	0.15	AmpC
2	186	3.50485	0.1918	GAKGVETADKVLKGE	0	-0.55	RbsA
1	8	3.15206	0.191063	EEGKLVIWINGDKGY	-1	-0.55	MBP
1	6	3.13997	0.190224	SASALAKIEEGKLVI	0	0.63	MBP
2	278	3.47157	0.190096	IHQLESDIVTIDYRV	-1.7	0.08	SpeD
2	304	3.47157	0.190096	MMITLRKLPLAVAVA	2	1.52	LamB
1	66	3.1329	0.189733	IDTSKVNYGVTVLPT	0	0.25	MBP
2	91	3.45267	0.189129	VGLRTEPNLELLTEM	-2	-0.04	FhuD
2	203	3.40221	0.186546	KGLLLRRQGGGTFVQ	3	-0.25	PdhR
2	177	3.36484	0.184633	GALRALQTAGKSDVM	1	0.09	RbsA
2	294	3.36033	0.184402	MLLKEFDLKHYMFHT	0.6	-0.16	SpeD
2	133	3.3264	0.182666	MNMKKLATLVSAVAL	2	1.08	RbsA
2	282	3.32361	0.182523	GFTRDINGMKHFIDH	0.6	-0.69	SpeD
2	272	3.32296	0.18249	CTFRADIEVSTCGVI	-1	0.86	SpeD
2	114	3.32039	0.182358	LFQEILDEYGIPNAW	-3	-0.03	FhuD
2	382	3.3017	0.181401	FATYAKWDEKWGYDY	-1	-1.25	LamB
2	153	3.30149	0.18139	KMANQANIPVITLDR	1	-0.15	RbsA
2	285	3.27744	0.180159	IDHEINSIQNFMSDD	-3.7	-0.74	SpeD
2	332	3.26885	0.17972	DFYYWDISGPGAGLE	-3	-0.31	LamB
2	230	3.25618	0.179071	PLVSSHRTRIFEAIM	1.3	0.26	PdhR
1	218	2.96742	0.178253	AEKRNIFLVGPMGAG	1	0.17	AroK
1	243	2.95296	0.177251	YLETTIEKQLARTQR	1	-1.09	AroK
2	60	3.21366	0.176895	PDSIINGSDNKIALA	-1	-0.04	AmpC
2	348	3.20443	0.176422	ANLRDNYRLVDGASK	1	-0.93	LamB
2	86	3.20249	0.176323	PYGVADTINYRLWVS	0	0	FhuD
2	142	3.19863	0.176125	DGAQKEADKLGYNLV	-1	-0.8	RbsA
2	333	3.19627	0.176004	DISGPGAGLENIDVG	-3	0.05	LamB
2	37	3.19476	0.175927	PSGLSFEQAMQTRVF	0	-0.13	AmpC
2	326	3.19025	0.175697	VQGKNLIEWLPGSTI	0	0.11	LamB
2	93	3.18488	0.175422	LLTEMKPSFMVWSAG	0	0.51	FhuD
1	9	2.9262	0.175394	LVIWINGDKGYNGLA	0	0.32	MBP
1	81	2.90599	0.173992	KDKPLGAVALKSYEE	0	-0.73	MBP
2	248	3.15052	0.173663	DGYIAYIDELYNANR	-2	-0.66	SpeD
1	35	2.89783	0.173426	EALSLIYNKDLLPNP	-1	-0.11	MBP
2	284	3.11015	0.171597	MKHFIDHEINSIQNF	-0.4	-0.51	SpeD
2	138	3.10156	0.171157	KDTIALVVSTLNNPF	0	0.46	RbsA
2	370	3.08245	0.170179	WTVGIRPMYKWTPIM	2	0.03	LamB
2	92	3.0788	0.169992	EPNLELLTEMKPSFM	-2	-0.31	FhuD
2	367	3.05024	0.16853	MYQDINWDNDNGTKW	-2	-1.75	LamB
1	95	2.82619	0.168456	ASGRQTVDEALKDAQ	-1	-0.96	MBP
2	376	3.04057	0.168035	TGDKNNQYKITLAQQ	1	-1.45	LamB
1	237	2.81547	0.167712	LATGGGSVKSRETRN	2	-0.95	AroK
2	192	3.02297	0.167134	IRQPKLSDVIEQQLE	-1	-0.73	PdhR
2	347	2.99999	0.165958	VDYGRANLRDNYRLV	1	-0.85	LamB
1	221	2.78529	0.165618	GAGKSTIGRQLAQQL	2	-0.39	AroK
2	373	2.98861	0.165375	STVMEIGYDNVESQR	-2	-0.75	LamB
1	17	2.78085	0.16531	HPDKLEEKfPQVAAT	-0.7	-0.97	MBP
2	283	2.9841	0.165144	DINGMKHFIDHEINS	-1.4	-0.72	SpeD
1	47	2.77793	0.165107	PLIAADGGYAFKYEN	-1	-0.19	MBP
2	179	2.96692	0.164265	KSDVMVVGFDGTPDG	-2	-0.09	RbsA
2	276	2.95811	0.163814	PLKALNYLIHQLESD	-0.7	-0.22	SpeD
2	383	2.94501	0.163144	KWDEKWGYDYTGNAD	-2	-1.96	LamB
2	155	2.93879	0.162825	ITLDRQATKGEVVSH	0.3	-0.41	RbsA
2	71	2.93685	0.162726	GIVMLANKNYPNPAR	2	-0.39	AmpC
2	56	2.93621	0.162693	WQTGDMYQGLGWEML	-2	-0.51	AmpC
2	109	2.9302	0.162385	KRGARPLLLTTLIDP	2	0.01	FhuD
2	228	2.9055	0.161121	ELLYSRREMLPLVSS	0	0	PdhR
2	325	2.90035	0.160857	FREANVQGKNLIEWL	0	-0.42	LamB
1	238	2.70964	0.16037	GGSVKSRETRNRLSA	3	-1.23	AroK
2	89	2.88102	0.159868	EPPLPDSVIDVGLRT	-2	-0.08	FhuD
1	154	2.70118	0.159783	FNKATLKPEGQAALD	0	-0.58	proOmpA
2	232	2.87479	0.159549	FEAIMAGKPEEAREA	-2	-0.53	PdhR
2	379	2.86856	0.159231	WQAGDSIWSRPAIRV	1	-0.31	LamB
1	129	2.69262	0.159189	ADTKSNVYGKNHDTG	0.3	-1.55	proOmpA
2	40	2.8647	0.159033	QPLKLNHTWINVPPA	1.3	-0.39	AmpC
1	28	2.68928	0.158958	KAFQDKLYPFTWDAV	0	-0.37	MBP
2	236	2.85353	0.158461	AFIEEILLDRSREES	-3	-0.46	PdhR
2	331	2.84258	0.157901	DVHMIDFYYWDISGP	-2.7	-0.14	LamB
1	189	2.66332	0.157156	PHVFQKDWQPEVKLD	-0.7	-1.17	SecB
2	225	2.81982	0.156735	RCMEPMLAQNVRQNF	1	-0.61	PdhR
2	54	2.8196	0.156724	QGIQLAQSRYWQTGD	0	-1.09	AmpC
2	320	2.81252	0.156362	KSFYFDTNVAYSVAQ	0	-0.11	LamB
2	87	2.79899	0.155669	DTINYRLWVSEPPLP	-1	-0.48	FhuD
2	227	2.78889	0.155153	VRQNFELLYSRREML	1	-0.62	PdhR
2	128	2.7861	0.15501	FQRVPAVWFYGATLS	1	0.51	FhuD
2	234	2.78524	0.154966	EAREASHRHLAFIEE	-1.4	-0.91	PdhR
2	330	2.7672	0.154042	FYQRHDVHMIDFYYW	-0.4	-0.67	LamB
2	204	2.76678	0.15402	RRQGGGTFVQSSLWQ	2	-0.87	PdhR
2	70	2.76312	0.153833	PEKELGIVMLANKNY	0	-0.34	AmpC
2	143	2.75861	0.153603	EADKLGYNLVVLDSQ	-2	-0.15	RbsA
2	137	2.72919	0.152097	ANAMAKDTIALVVST	0	0.85	RbsA
2	124	2.72683	0.151976	MDALMATPLWQAMPF	-1	0.65	FhuD
2	130	2.71481	0.15136	GATLSAMHFVRVLDN	0.3	0.51	FhuD
2	300	2.70901	0.151063	RQEITAALWKEMREI	0	-0.68	SpeD
2	277	2.69698	0.150448	LNYLIHQLESDIVTI	-1.7	0.61	SpeD
2	44	2.6899	0.150085	AWGYREGKAVHVSPG	1.3	-0.59	AmpC
2	32	2.68539	0.149854	PAWAPGTQRLYANSS	1	-0.69	AmpC
2	309	2.67508	0.149327	VDFHGYARSGIGWTG	0.3	-0.21	LamB
2	136	2.65103	0.148096	SATVSANAMAKDTIA	0	0.38	RbsA
2	226	2.64566	0.147821	MLAQNVRQNFELLYS	0	-0.13	PdhR
2	94	2.64308	0.147689	KPSFMVWSAGYGPSP	1	-0.23	FhuD
2	264	2.63041	0.14704	HPGPLPETVVAHLDK	-0.4	-0.36	SpeD
2	377	2.62333	0.146678	NQYKITLAQQWQAGD	0	-1.09	LamB
2	318	2.62161	0.14659	LGQEVWKEGDKSFYF	-1	-0.8	LamB
2	33	2.60937	0.145963	GTQRLYANSSIGLFG	1	0.03	AmpC
2	183	2.60615	0.145798	DGKLAATIAQLPDQI	-1	0.09	RbsA
2	41	2.60593	0.145787	NHTWINVPPAEEKNY	-0.7	-1.35	AmpC
2	176	2.5997	0.145469	DEMALGALRALQTAG	-1	0.27	RbsA
2	321	2.59068	0.145007	DTNVAYSVAQQNDWE	-3	-1.08	LamB
1	5	2.48358	0.144687	TMMFSASALAKIEEG	-1	0.45	MBP
2	90	2.58145	0.144534	DSVIDVGLRTEPNLE	-3	-0.33	FhuD
2	322	2.5763	0.14427	YSVAQQNDWEATDPA	-3	-1.11	LamB
2	259	2.5632	0.1436	SVTILVSEEPVDPKL	-2	0.32	SpeD
2	178	2.56255	0.143567	LQTAGKSDVMVVGFD	-1	0.41	RbsA
2	129	2.55869	0.143369	AVWFYGATLSAMHFV	0.3	1.19	FhuD
2	205	2.55332	0.143094	GTFVQSSLWQSFSDP	-1	-0.25	PdhR
2	47	2.55182	0.143017	ALDAEAYGVKSTIED	-3	-0.21	AmpC
2	28	2.5269	0.141742	QVPDEVKSSSDLLRF	-1	-0.51	AmpC
2	293	2.52046	0.141412	FHTKMLLKEFDLKHY	1.6	-0.55	SpeD
2	310	2.5065	0.140698	YARSGIGWTGSGGEQ	0	-0.78	LamB
2	175	2.50479	0.14061	VFAQNDEMALGALRA	-1	0.32	RbsA
2	45	2.48782	0.139742	EGKAVHVSPGALDAE	-1.7	-0.21	AmpC
1	130	2.40137	0.138983	SNVYGKNHDTGVSPV	0.3	-0.73	proOmpA
2	323	2.46635	0.138642	QNDWEATDPAFREAN	-3	-1.6	LamB
2	182	2.46377	0.138511	EKAVNDGKLAATIAQ	0	-0.21	RbsA
2	374	2.45582	0.138104	IGYDNVESQRTGDKN	-1	-1.62	LamB
2	353	2.44272	0.137433	QSVLKGFNKFVVQYA	2	0.2	LamB
2	88	2.42963	0.136763	RLWVSEPPLPDSVID	-2	-0.12	FhuD
2	158	2.38732	0.134597	IASDNVLGGKIAGDY	-1	0.19	RbsA
2	62	2.38346	0.1344	KIALAARPVKAITPP	3	0.43	AmpC
2	76	2.37551	0.133993	LISRRRLLTAMALSP	3	0.52	FhuD
2	152	2.37465	0.133949	VGNAVKMANQANIPV	1	0.3	RbsA
2	105	2.37121	0.133773	AETHLAQYEDFIRSM	-1.7	-0.53	FhuD
2	251	2.36756	0.133586	ANRLTEILSETCSII	-1	0.49	SpeD
1	102	2.32147	0.133441	TVAQAAPKDNTWYTG	0	-0.74	proOmpA
2	148	2.35897	0.133146	QDLTVRGTKILLINP	1	0.15	RbsA
2	195	2.34673	0.13252	FLILEGTLRPGEKLP	0	0.16	PdhR
2	156	2.34609	0.132487	QATKGEVVSHIASDN	-0.7	-0.49	RbsA
2	55	2.33492	0.131915	AQSRYWQTGDMYQGL	0	-1.12	AmpC
2	288	2.32569	0.131443	SDDMKALYDMVDVNV	-3	-0.1	SpeD
2	336	2.31302	0.130794	FGKLSLAATRSSEAG	1	0	LamB
2	135	2.30593	0.130431	SAVALSATVSANAMA	0	1.22	RbsA
2	199	2.30464	0.130365	AKQFDVSRPSLREAI	1	-0.51	PdhR
2	246	2.30142	0.130201	YAKTAEERDGYIAYI	-1	-0.63	SpeD
2	261	2.29992	0.130124	EPVDPKLIDKTEHPG	-1.7	-1.23	SpeD
2	265	2.29863	0.130058	LPETVVAHLDKSHIC	-0.4	0.29	SpeD
2	57	2.29391	0.129816	MYQGLGWEMLDWPVN	-2	-0.26	AmpC
2	36	2.28596	0.129409	ALAVKPSGLSFEQAM	0	0.49	AmpC
2	299	2.28467	0.129343	TDSERQEITAALWKE	-2	-1.14	SpeD
2	48	2.27394	0.128794	AYGVKSTIEDMARWV	0	-0.07	AmpC
2	368	2.272	0.128695	NWDNDNGTKWWTVGI	-1	-1.17	LamB
2	118	2.26663	0.12842	FWGSTAVSIDRLAAY	0	0.52	FhuD
2	319	2.25955	0.128057	WKEGDKSFYFDTNVA	-1	-0.95	LamB
2	302	2.25611	0.127881	WKEMREIYYGRNMPA	1	-1.25	SpeD
2	271	2.25418	0.127782	EGGLCTFRADIEVST	-2	0.11	SpeD
2	97	2.2486	0.127497	EMLARIAPGRGFNFS	1	0.01	FhuD
2	110	2.24473	0.127299	PLLLTTLIDPRHMLV	0.3	0.92	FhuD
2	305	2.237	0.126903	RKLPLAVAVAAGVMS	2	1.21	LamB
2	223	2.23227	0.126661	AHNVVLLHLLRCMEP	0.6	0.69	PdhR
2	249	2.22691	0.126386	AYIDELYNANRLTEI	-2	-0.34	SpeD
2	112	2.22605	0.126342	RHMLVFGPNSLFQEI	0.3	0.19	FhuD
2	200	2.21853	0.125958	VSRPSLREAIQRLEA	1	-0.49	PdhR
2	317	2.21059	0.125551	YAELKLGQEVWKEGD	0	-0.42	LamB
2	349	2.21059	0.125551	NYRLVDGASKDGWLF	-2	-0.98	LamB
2	123	2.20543	0.125287	DNSKDMDALMATPLW	-2	-0.46	FhuD
2	66	2.19341	0.124672	ASWVHKTGATGGFGS	1.3	-0.13	AmpC
2	224	2.1919	0.124595	LLHLLRCMEPMLAQN	0.3	0.49	PdhR
2	134	2.17064	0.123506	LATLVSAVALSATVS	0	1.83	RbsA
1	122	2.17381	0.123197	GVQLTAKLGYPITDD	-1	-0.09	proOmpA
2	262	2.16227	0.123078	PKLIDKTEHPGPLPE	-0.7	-1.13	SpeD
2	103	2.15819	0.122869	MADLLNLQSAAETHL	-1.7	0.25	FhuD
1	178	2.16022	0.122254	IDCLAPDRRVEIEVK	-1	-0.2	proOmpA
2	242	2.12877	0.121363	FNNLTKSLSFCIYDI	0	0.45	SpeD
2	252	2.12598	0.12122	TEILSETCSIIGANI	-2	0.81	SpeD
2	98	2.1249	0.121165	IAPGRGFNFSDGKQP	1	-0.81	FhuD
2	371	2.12147	0.120989	RPMYKWTPIMSTVME	1	-0.34	LamB
2	81	2.12082	0.120956	AAIDPNRIVALEWLP	-1	0.47	FhuD
2	314	2.11631	0.120725	TGAQSKYRLGNECET	0	-1.24	LamB
2	104	2.11159	0.120484	NLQSAAETHLAQYED	-2.7	-0.93	FhuD
2	311	2.11137	0.120473	IGWTGSGGEQQCFQT	-1	-0.59	LamB
1	75	2.12493	0.119805	PNKELAKEFLENYLL	-1	-0.56	MBP
2	82	2.09162	0.119461	NRIVALEWLPVELLL	-1	1.08	FhuD
2	12	2.08797	0.119275	YFTWGYADIAKKQPV	1	-0.39	AmpC
2	308	2.08582	0.119165	AQAMAVDFHGYARSG	0.3	-0.1	LamB
2	345	2.0652	0.118109	INPGGTLELGVDYGR	-1	-0.26	LamB
2	64	2.04802	0.11723	AITPPTPAVRASWVH	1.3	0.18	AmpC
2	11	2.04287	0.116966	QGKPYYFTWGYADIA	0	-0.53	AmpC
2	59	2.04158	0.1169	DWPVNPDSIINGSDN	-3	-0.93	AmpC
2	297	2.03965	0.116801	FHTKPEDLTDSERQE	-2.7	-1.99	SpeD
2	253	2.03879	0.116757	SETCSIIGANILNIA	-1	0.98	SpeD
2	58	2.03492	0.116559	GWEMLDWPVNPDSII	-3	-0.09	AmpC
2	247	2.0229	0.115944	AEERDGYIAYIDELY	-4	-0.66	SpeD
2	85	2.004	0.114977	ALGIVPYGVADTINY	-1	0.81	FhuD
2	111	1.99648	0.114592	TLIDPRHMLVFGPNS	0.3	0.08	FhuD
2	346	1.98768	0.114141	TLELGVDYGRANLRD	-1	-0.56	LamB
2	83	1.9851	0.114009	LEWLPVELLLALGIV	-2	1.84	FhuD
2	198	1.97501	0.113493	PERELAKQFDVSRPS	0	-1.27	PdhR
2	344	1.97265	0.113372	LAQMEINPGGTLELG	-2	0.14	LamB
2	22	1.96019	0.112734	TKYWPELTAKQWNGI	1	-0.98	AmpC
2	372	1.94838	0.11213	WTPIMSTVMEIGYDN	-2	0.01	LamB
2	266	1.94022	0.111712	VVAHLDKSHICVHTY	0.9	0.36	SpeD
2	116	1.93507	0.111448	IPNAWQGETNFWGST	-1	-0.75	FhuD
2	250	1.93464	0.111426	ELYNANRLTEILSET	-2	-0.52	SpeD
2	270	1.93335	0.11136	ESHPEGGLCTFRADI	-1.7	-0.45	SpeD
2	343	1.93034	0.111206	VFDVRLAQMEINPGG	-1	0.15	LamB
1	93	1.99621	0.110876	VRTAVINAASGRQTV	2	0.26	MBP
2	296	1.92326	0.110844	KHYMFHTKPEDLTDS	-0.4	-1.42	SpeD
2	254	1.91638	0.110492	SIIGANILNIARQDY	0	0.29	SpeD
2	384	1.90994	0.110162	WGYDYTGNADNNANF	-2	-1.31	LamB
2	100	1.90006	0.109656	DGKQPLAMARKSLTE	1	-0.88	FhuD
2	312	1.88632	0.108953	SGGEQQCFQTTGAQS	-1	-0.97	LamB
2	316	1.87601	0.108425	NECETYAELKLGQEV	-3	-0.75	LamB
2	6	1.86162	0.107689	DIVHRTITPLIEQQK	0.3	-0.47	AmpC
2	307	1.85862	0.107535	AGVMSAQAMAVDFHG	-0.7	0.69	LamB
2	355	1.84938	0.107062	VVQYATDSMTSQGKG	0	-0.49	LamB
2	244	1.83822	0.106491	SFCIYDICYAKTAEE	-2	0.13	SpeD
2	7	1.83328	0.106238	TITPLIEQQKIPGMA	0	0.11	AmpC
2	50	1.83006	0.106073	MARWVQSNLKPLDIN	1	-0.38	AmpC
2	303	1.82662	0.105897	KEMREIYYGRNMPAV	1	-0.84	SpeD
1	96	1.92273	0.105778	QTVDEALKDAQTRIT	-1	-0.79	MBP
2	8	1.82061	0.105589	IEQQKIPGMAVAVIY	0	0.65	AmpC
2	84	1.81825	0.105469	VELLLALGIVPYGVA	-1	1.91	FhuD
1	104	1.91488	0.105233	DNTWYTGAKLGWSQY	0	-1.08	proOmpA
2	29	1.78883	0.103963	VKSSSDLLRFYQNWQ	1	-0.83	AmpC
1	53	1.89538	0.10388	VDNAGAKAGLTFLVD	-1	0.55	MBP
2	269	1.7768	0.103347	HTYPESHPEGGLCTF	-1.4	-0.79	SpeD
2	263	1.77079	0.103039	DKTEHPGPLPETVVA	-1.7	-0.68	SpeD
2	80	1.77036	0.103017	NTAHAAAIDPNRIVA	0.3	0.11	FhuD
1	256	1.88209	0.102958	TDDQSAKVVANQIIH	-0.7	-0.34	AroK
2	30	1.75146	0.10205	DLLRFYQNWQPAWAP	0	-0.72	AmpC
2	113	1.74974	0.101962	FGPNSLFQEILDEYG	-3	-0.29	FhuD
2	102	1.74824	0.101885	KSLTEMADLLNLQSA	-1	0.03	FhuD
2	295	1.74223	0.101577	EFDLKHYMFHTKPED	-1.4	-1.37	SpeD
2	342	1.74137	0.101533	ETANDVFDVRLAQME	-3	-0.38	LamB
2	122	1.73986	0.101456	LCFDHDNSKDMDALM	-2.7	-0.46	FhuD
2	341	1.73428	0.101171	YDYTNETANDVFDVR	-3	-1.1	LamB
2	298	1.72397	0.100643	PEDLTDSERQEITAA	-4	-1.16	SpeD
2	120	1.72161	0.100522	RLAAYKDVDVLCFDH	-0.7	0.1	FhuD
2	150	1.72097	0.100489	LLINPTDSDAVGNAV	-2	0.44	RbsA
1	87	1.84143	0.100137	ATMENAQKGEIMPNI	-1	-0.51	MBP
1	159	1.83882	0.0999566	LSNLDPKDGSVVVLG	-1	0.37	proOmpA
1	231	1.8346	0.0996641	EGEEGFRDREEKVIN	-3	-1.78	AroK
2	149	1.70443	0.0996428	RGTKILLINPTDSDA	0	-0.31	RbsA
2	117	1.70035	0.0994339	QGETNFWGSTAVSID	-2	-0.36	FhuD
2	21	1.69434	0.0991261	LSDPTTKYWPELTAK	0	-0.91	AmpC
2	292	1.67952	0.0983677	QENIFHTKMLLKEFD	-0.7	-0.64	SpeD
2	245	1.67673	0.0982248	YDICYAKTAEERDGY	-2	-1.12	SpeD
2	306	1.66256	0.0974993	AVAVAAGVMSAQAMA	0	1.62	LamB
1	131	1.80172	0.0973831	GKNHDTGVSPVFAGG	0.3	-0.39	proOmpA
1	60	1.79046	0.0966018	SIAEAAFNKGETAMT	-1	-0.04	MBP
2	171	1.63056	0.0958615	RIKGLNVMQNLLTAH	2.3	0.04	RbsA
2	72	1.61939	0.0952899	ANKNYPNPARVDAAW	1	-1.09	AmpC
2	13	1.60479	0.0945425	YADIAKKQPVTQQTL	1	-0.67	AmpC
2	146	1.6035	0.0944765	NNPAKELANVQDLTV	-1	-0.51	RbsA
2	101	1.59985	0.0942896	LAMARKSLTEMADLL	0	0.5	FhuD
2	119	1.58138	0.0933443	AVSIDRLAAYKDVDV	-1	0.35	FhuD
2	51	1.57687	0.0931135	QSNLKPLDINEKTLQ	0	-1.07	AmpC
2	174	1.56334	0.092421	PDVQAVFAQNDEMAL	-3	-0.02	RbsA
2	196	1.55948	0.0922231	GTLRPGEKLPPEREL	0	-1.22	PdhR
1	234	1.7232	0.0919357	VINELTEKQGIVLAT	-1	0.47	AroK
2	267	1.49849	0.0891014	LDKSHICVHTYPESH	-0.1	-0.71	SpeD
2	366	1.49055	0.0886947	MMYVGMYQDINWDND	-3	-0.7	LamB
2	339	1.48668	0.0884968	GSSSFASNNIYDYTN	-1	-0.79	LamB
2	206	1.48045	0.0881781	SSLWQSFSDPLVELL	-2	0.4	PdhR
2	23	1.47208	0.0877494	ELTAKQWNGITLLHL	0.3	0.08	AmpC
2	14	1.46886	0.0875845	KKQPVTQQTLFELGS	1	-0.76	AmpC
2	255	1.46606	0.0874416	ANILNIARQDYEPQG	-1	-0.83	SpeD
2	77	1.45017	0.0866282	RLLTAMALSPLLWQM	1	0.96	FhuD
2	356	1.44695	0.0864633	TDSMTSQGKGLSQGS	0	-0.97	LamB
1	225	1.64172	0.0862828	MEFYDSDQEIEKRTG	-3	-1.56	AroK
2	24	1.44287	0.0862545	QWNGITLLHLATYTA	0.3	0.31	AmpC
1	86	1.64031	0.0861849	PRIAATMENAQKGEI	0	-0.59	MBP
2	257	1.43707	0.0859577	QDYEPQGASVTILVS	-2	-0.07	SpeD
2	197	1.42999	0.0855949	GEKLPPERELAKQFD	-1	-1.41	PdhR
1	91	1.62917	0.0854122	QMSAFWYAVRTAVIN	1	0.52	MBP
2	121	1.42226	0.0851992	KDVDVLCFDHDNSKD	-2.7	-1.02	FhuD
2	256	1.42032	0.0851003	NIARQDYEPQGASVT	-1	-0.97	SpeD
2	79	1.41581	0.0848695	LLWQMNTAHAAAIDP	-0.7	0.29	FhuD
1	117	1.61331	0.084312	DWLGRMPYKGSVENG	0	-0.99	proOmpA
2	167	1.40357	0.0842429	QQAVAAHKFNVLASQ	1.3	0.02	RbsA
2	268	1.39262	0.0836823	HICVHTYPESHPEGG	-1.1	-0.81	SpeD
2	212	1.38811	0.0834515	ALEGIAAYYAALRST	0	0.57	PdhR
2	258	1.37609	0.0828359	PQGASVTILVSEEPV	-2	0.42	SpeD
2	361	1.35161	0.0815829	YNINNNGHMLRILDH	0.6	-0.77	LamB
2	115	1.32584	0.0802638	LDEYGIPNAWQGETN	-3	-1.08	FhuD
2	173	1.32541	0.0802418	LLTAHPDVQAVFAQN	-0.7	0.31	RbsA
2	52	1.31746	0.0798351	PLDINEKTLQQGIQL	-1	-0.48	AmpC
1	7	1.54013	0.0792349	LAKIEEGKLVIWING	0	0.47	MBP
2	340	1.27365	0.0775927	ASNNIYDYTNETAND	-3	-1.41	LamB
2	168	1.27065	0.0774389	AHKFNVLASQPADFD	-0.7	-0.3	RbsA
2	194	1.25819	0.0768013	EQQLEFLILEGTLRP	-2	-0.15	PdhR
1	57	1.49811	0.0763197	IKNKHMNADTDYSIA	0.3	-0.89	MBP
2	218	1.1899	0.0733059	LAQQSGDLDAESNAV	-3	-0.39	PdhR
2	170	1.18711	0.073163	PADFDRIKGLNVMQN	0	-0.59	RbsA
2	78	1.1811	0.0728552	MALSPLLWQMNTAHA	0.3	0.43	FhuD
2	338	1.15425	0.0714812	SSEAGGSSSFASNNI	-1	-0.35	LamB
2	222	1.11195	0.0693157	AVTEAAHNVVLLHLL	-0.4	1.27	PdhR
2	217	1.0632	0.0668206	HHAIELAQQSGDLDA	-2.4	-0.51	PdhR
2	216	1.05783	0.0665458	RIRELHHAIELAQQS	0.6	-0.67	PdhR
2	364	1.05676	0.0664908	GAISMGDNWDMMYVG	-2	0.1	LamB
1	158	1.34375	0.0656109	LYSQLSNLDPKDGSV	-1	-0.53	proOmpA
2	214	1.03357	0.0653037	ALRSTDEDKERIREL	-1	-1.5	PdhR
2	16	1.02562	0.0648969	FELGSVSKTFTGVLG	0	0.67	AmpC
1	125	1.32828	0.0645382	TDDLDIYTRLGGMVW	-2	-0.08	proOmpA
2	362	1.01574	0.0643913	NGHMLRILDHGAISM	0.6	0.18	LamB
2	359	0.980955	0.0626106	GVAFDNEKFAYNINN	-1	-0.58	LamB
2	172	0.980096	0.0625666	NVMQNLLTAHPDVQA	-0.7	-0.1	RbsA
1	206	1.29627	0.0623173	CLGAYCPNILFPYAR	1	0.62	SecB
2	5	0.971507	0.062127	PQQINDIVHRTITPL	0.3	-0.32	AmpC
2	20	0.971077	0.062105	RGEIKLSDPTTKYWP	1	-1.27	AmpC
2	350	0.963776	0.0617312	DGASKDGWLFTAEHT	-1.7	-0.75	LamB
1	59	1.27176	0.0606168	DTDYSIAEAAFNKGE	-3	-0.79	MBP
2	363	0.936074	0.0603133	RILDHGAISMGDNWD	-1.7	-0.51	LamB
2	357	0.915673	0.059269	SQGKGLSQGSGVAFD	0	-0.39	LamB
2	365	0.910734	0.0590162	GDNWDMMYVGMYQDI	-3	-0.49	LamB
2	290	0.890333	0.057972	DMVDVNVYQENIFHT	-2.7	-0.29	SpeD
2	360	0.889474	0.057928	NEKFAYNINNNGHML	0.3	-1	LamB
2	145	0.877019	0.0572905	VLDSQNNPAKELANV	-1	-0.51	RbsA
1	88	1.21901	0.0569575	NAQKGEIMPNIPQMS	0	-0.75	MBP
2	219	0.866926	0.0567738	GDLDAESNAVLQYQI	-3	-0.24	PdhR
2	354	0.837291	0.0552569	GFNKFVVQYATDSMT	0	-0.04	LamB
2	221	0.823977	0.0545754	LQYQIAVTEAAHNVV	-0.7	0.47	PdhR
1	15	1.17985	0.0542403	TGIKVTVEHPDKLEE	-1.7	-0.78	MBP
2	4	0.801428	0.0534213	STFAAPQQINDIVHR	0.3	-0.35	AmpC
1	176	1.16571	0.0532598	NVKQRAALIDCLAPD	0	0.01	proOmpA
2	215	0.793483	0.0530146	DEDKERIRELHHAIE	-2.4	-1.71	PdhR
1	92	1.14627	0.0519113	FWYAVRTAVINAASG	1	0.72	MBP
2	213	0.748172	0.0506952	AAYYAALRSTDEDKE	-2	-1.03	PdhR
1	211	1.10263	0.0488833	MVSRGTFPQLNLAPV	1	0.39	SecB
1	89	1.10068	0.0487482	GEIMPNIPQMSAFWY	-1	0.02	MBP
2	211	0.668501	0.0466172	LETRHALEGIAAYYA	-0.7	0.06	PdhR
1	90	1.06241	0.0460935	PNIPQMSAFWYAVRT	1	-0.09	MBP
2	1	0.653254	0.0458368	MFKTTLCALLITASC	1	1.49	AmpC
1	240	1.05871	0.0458365	TRNRLSARGVVVYLE	2	-0.11	AroK
2	161	0.650033	0.0456719	IAKKAGEGAKVIELQ	1	-0.04	RbsA
2	337	0.63586	0.0449464	LAATRSSEAGGSSSF	0	-0.1	LamB
1	63	1.03688	0.0443219	AMTINGPWAWSNIDT	-1	-0.13	MBP
1	62	1.02892	0.0437696	KGETAMTINGPWAWS	0	-0.49	MBP
2	358	0.607514	0.0434955	LSQGSGVAFDNEKFA	-1	-0.21	LamB
1	180	1.01039	0.042484	RVEIEVKGIKDVVTQ	0	-0.11	proOmpA
1	71	1.00345	0.0420032	SKPFVGVLSAGINAA	1	0.9	MBP
1	99	0.995064	0.0414211	AIAIAVALAGFATVA	0	2.37	proOmpA
1	2	0.985287	0.0407428	TGARILALSALTTMM	1	1.15	MBP
2	207	0.545452	0.0403188	SFSDPLVELLSDHPE	-3.7	-0.29	PdhR
2	289	0.541372	0.0401099	KALYDMVDVNVYQEN	-2	-0.49	SpeD
1	3	0.969677	0.0396598	ILALSALTTMMFSAS	0	1.61	MBP
1	105	0.967754	0.0395264	YTGAKLGWSQYHDTG	0.3	-1.03	proOmpA
1	170	0.964413	0.0392946	GIPADKISARGMGES	0	-0.35	proOmpA
2	193	0.523334	0.0391866	LSDVIEQQLEFLILE	-4	0.63	PdhR
2	220	0.516247	0.0388239	ESNAVLQYQIAVTEA	-2	0.12	PdhR
1	32	0.944644	0.0379232	YNGKLIAYPIAVEAL	0	0.71	MBP
1	142	0.932557	0.0370846	RPDNGMLSLGVSYRF	1	-0.32	proOmpA
1	43	0.915973	0.0359341	GKSALMFNLQEPYFT	0	-0.15	MBP
1	106	0.915082	0.0358723	KLGWSQYHDTGFINN	0.3	-0.97	proOmpA
1	37	0.905272	0.0351917	KDLLPNPPKTWEEIP	-1	-1.18	MBP
1	100	0.902896	0.0350269	AVALAGFATVAQAAP	0	1.43	proOmpA
2	67	0.43808	0.0348228	KTGATGGFGSYVAFI	1	0.59	AmpC
2	17	0.42992	0.0344051	VSKTFTGVLGGDAIA	0	0.82	AmpC
2	165	0.42541	0.0341742	SAARERGEGFQQAVA	0	-0.69	RbsA
2	209	0.422833	0.0340423	SDHPESQYDLLETRH	-2.4	-1.73	PdhR
2	208	0.419827	0.0338884	LVELLSDHPESQYDL	-3.7	-0.39	PdhR
1	14	0.885305	0.0338065	FEKDTGIKVTVEHPD	-1.7	-0.85	MBP
1	29	0.881147	0.0335181	DKLYPFTWDAVRYNG	0	-0.83	MBP
1	44	0.86505	0.0324013	LMFNLQEPYFTWPLI	-1	0.45	MBP
1	144	0.860264	0.0320693	LGVSYRFGQGEAAPV	0	0.15	proOmpA
1	83	0.855875	0.0317648	ALKSYEEELAKDPRI	-1	-0.95	MBP
1	21	0.852979	0.0315639	DGPDIIFWAHDRFGG	-1.7	-0.37	MBP
1	186	0.837493	0.0304895	YTKDISFEAPNAPHV	-0.7	-0.57	SecB
1	114	0.83727	0.0304741	QVNPYVGFEMGYDWL	-2	-0.2	proOmpA
1	18	0.835776	0.0303705	LEEKfPQVAATGDGP	-2	-0.55	MBP
2	19	0.348961	0.0302611	GDAIARGEIKLSDPT	-1	-0.43	AmpC
1	145	0.830644	0.0300145	YRFGQGEAAPVVAPA	0	0.11	proOmpA
1	188	0.820777	0.0293299	APNAPHVFQKDWQPE	-0.7	-1.31	SecB
2	2	0.326842	0.0291289	LCALLITASCSTFAA	0	1.86	AmpC
1	182	0.815009	0.0289298	MSEQNNTEMTFQIQR	-1	-1.34	SecB
1	210	0.810265	0.0286007	CITSMVSRGTFPQLN	1	0.21	SecB
1	192	0.804407	0.0281943	KLDLDTASSQLADDV	-3	-0.3	SecB
1	45	0.802336	0.0280506	LQEPYFTWPLIAADG	-2	0.1	MBP
1	46	0.801124	0.0279664	YFTWPLIAADGGYAF	-1	0.61	MBP
1	258	0.794548	0.0275102	AKVVANQIIHMLESN	0.3	0.32	AroK
1	209	0.790406	0.0272229	YARECITSMVSRGTF	1	0.03	SecB
1	185	0.774078	0.0260901	IQRIYTKDISFEAPN	0	-0.58	SecB
1	164	0.763311	0.0253432	GSDAYNQGLSERRAQ	0	-1.52	proOmpA
1	126	0.751059	0.0244932	DIYTRLGGMVWRADT	0	-0.28	proOmpA
1	143	0.744697	0.0240519	GMLSLGVSYRFGQGE	0	0.03	proOmpA
1	115	0.743088	0.0239402	YVGFEMGYDWLGRMP	-1	-0.21	proOmpA
1	61	0.74228	0.0238842	AAFNKGETAMTINGP	0	-0.24	MBP
2	3	0.21861	0.0235889	ITASCSTFAAPQQIN	0	0.31	AmpC
1	175	0.733501	0.0232751	NTCDNVKQRAALIDC	0	-0.37	proOmpA
2	18	0.203149	0.0227975	TGVLGGDAIARGEIK	0	0.19	AmpC
1	227	0.721364	0.0224331	EIEKRTGADVGWVFD	-2	-0.49	AroK
1	213	0.715622	0.0220348	QLNLAPVNFDALFMN	-1	0.51	SecB
1	191	0.711216	0.0217291	QPEVKLDLDTASSQL	-2	-0.53	SecB
2	210	0.178238	0.0215224	SQYDLLETRHALEGI	-1.7	-0.48	PdhR
1	229	0.708097	0.0215127	DVGWVFDLEGEEGFR	-4	-0.42	AroK
1	212	0.706901	0.0214297	GTFPQLNLAPVNFDA	-1	0.18	SecB
1	94	0.690259	0.0202752	VINAASGRQTVDEAL	-1	0.11	MBP
2	26	0.145168	0.0198296	ATYTAGGLPLQVPDE	-2	-0.12	AmpC
1	140	0.682545	0.01974	GDAHTIGTRPDNGML	-0.7	-0.69	proOmpA
1	23	0.673114	0.0190858	AHDRFGGYAQSGLLA	0.3	-0.15	MBP
1	190	0.670573	0.0189095	QKDWQPEVKLDLDTA	-2	-1.23	SecB
1	136	0.666159	0.0186033	TPEIATRLEYQWTNN	-1	-1.19	proOmpA
1	163	0.665763	0.0185758	TDRIGSDAYNQGLSE	-2	-1.09	proOmpA
1	20	0.66309	0.0183903	AATGDGPDIIFWAHD	-2.7	-0.03	MBP
1	112	0.662875	0.0183755	GAGAFGGYQVNPYVG	0	0.11	proOmpA
1	197	0.657009	0.0179685	RVTVTASLGEETAFL	-1	0.51	SecB
1	22	0.654303	0.0177807	IIFWAHDRFGGYAQS	0.3	-0.02	MBP
1	138	0.648767	0.0173967	EYQWTNNIGDAHTIG	-1.7	-0.95	proOmpA
1	110	0.64715	0.0172845	GPTHENQLGAGAFGG	-0.7	-0.52	proOmpA
1	214	0.644806	0.0171219	APVNFDALFMNYLQQ	-1	0.17	SecB
1	160	0.644254	0.0170836	DPKDGSVVVLGYTDR	-1	-0.51	proOmpA
1	193	0.633379	0.0163292	DTASSQLADDVYEVV	-4	-0.07	SecB
1	141	0.631275	0.0161832	TIGTRPDNGMLSLGV	0	0.11	proOmpA
1	162	0.626993	0.0158861	VLGYTDRIGSDAYNQ	-1	-0.61	proOmpA
1	172	0.62545	0.0157791	ARGMGESNPVTGNTC	0	-0.64	proOmpA
1	177	0.625401	0.0157757	RAALIDCLAPDRRVE	0	-0.09	proOmpA
1	232	0.624081	0.0156841	GFRDREEKVINELTE	-2	-1.31	AroK
1	24	0.618082	0.015268	FGGYAQSGLLAEITP	-1	0.39	MBP
2	25	0.0558337	0.0152569	TLLHLATYTAGGLPL	0.3	0.91	AmpC
1	207	0.612662	0.0148919	YCPNILFPYARECIT	0	0.29	SecB
2	164	0.0392983	0.0144106	GIAGTSAARERGEGF	0	-0.43	RbsA
1	84	0.605162	0.0143716	YEEELAKDPRIAATM	-2	-0.69	MBP
1	166	0.603999	0.0142909	LSERRAQSVVDYLIS	0	-0.06	proOmpA
1	137	0.603075	0.0142268	ATRLEYQWTNNIGDA	-1	-0.94	proOmpA
1	257	0.595608	0.0137088	SAKVVANQIIHMLES	0.3	0.5	AroK
1	194	0.594708	0.0136464	SQLADDVYEVVLRVT	-2	0.33	SecB
1	19	0.592101	0.0134655	FPQVAATGDGPDIIF	-2	0.48	MBP
1	215	0.590897	0.0133819	FDALFMNYLQQQAGE	-2	-0.27	SecB
1	165	0.587456	0.0131432	YNQGLSERRAQSVVD	0	-1.05	proOmpA
1	155	0.587307	0.0131329	TLKPEGQAALDQLYS	-1	-0.51	proOmpA
1	226	0.584387	0.0129303	DSDQEIEKRTGADVG	-3	-1.41	AroK
2	74	0.00708659	0.0127617	PARVDAAWQILNALQ	0	0.16	AmpC
1	77	0.579148	0.0125668	FLENYLLTDEGLEAV	-4	0.27	MBP
1	195	0.577258	0.0124358	DDVYEVVLRVTVTAS	-2	0.54	SecB
1	208	0.576301	0.0123694	ILFPYARECITSMVS	0	0.85	SecB
2	162	-0.00085898	0.012355	GEGAKVIELQGIAGT	-1	0.26	RbsA
1	33	0.570154	0.0119429	LIAYPIAVEALSLIY	-1	1.73	MBP
1	111	0.565592	0.0116264	ENQLGAGAFGGYQVN	-1	-0.4	proOmpA
1	139	0.565179	0.0115978	TNNIGDAHTIGTRPD	-0.7	-1.03	proOmpA
1	76	0.564882	0.0115772	LAKEFLENYLLTDEG	-3	-0.27	MBP
1	171	0.564742	0.0115674	DKISARGMGESNPVT	0	-0.75	proOmpA
1	124	0.563405	0.0114747	GYPITDDLDIYTRLG	-2	-0.32	proOmpA
1	107	0.558513	0.0111353	SQYHDTGFINNNGPT	-0.7	-1.29	proOmpA
1	85	0.55843	0.0111296	LAKDPRIAATMENAQ	0	-0.49	MBP
1	198	0.557019	0.0110317	TASLGEETAFLCEVQ	-3	0.27	SecB
1	133	0.555254	0.0109092	SPVFAGGVEYAITPE	-2	0.37	proOmpA
1	156	0.553356	0.0107775	EGQAALDQLYSQLSN	-2	-0.62	proOmpA
1	113	0.551458	0.0106459	FGGYQVNPYVGFEMG	-1	-0.03	proOmpA
2	73	-0.0352182	0.0105963	PNPARVDAAWQILNA	0	-0.19	AmpC
1	216	0.550633	0.0105887	FMNYLQQQAGEGTEE	-3	-1.13	SecB
1	196	0.548422	0.0104353	EVVLRVTVTASLGEE	-2	0.57	SecB
1	228	0.548142	0.0104158	RTGADVGWVFDLEGE	-3	-0.3	AroK
1	230	0.54277	0.0100432	VFDLEGEEGFRDREE	-5	-1.38	AroK
1	241	0.541805	0.0099762	LSARGVVVYLETTIE	-1	0.74	AroK
1	246	0.539784	0.00983596	TQRDKKRPLLHVETP	2.3	-1.55	AroK
1	146	0.538777	0.00976613	QGEAAPVVAPAPAPA	-1	0.36	proOmpA
1	161	0.537927	0.00970718	GSVVVLGYTDRIGSD	-1	0.31	proOmpA
1	202	0.536574	0.0096133	GGIFSIAGIEGTQMA	-1	0.78	SecB
1	134	0.536459	0.00960529	AGGVEYAITPEIATR	-1	0.13	proOmpA
1	109	0.52862	0.00906152	INNNGPTHENQLGAG	-0.7	-1.17	proOmpA
1	58	0.521203	0.00854694	HMNADTDYSIAEAAF	-2.7	-0.24	MBP
1	222	0.520733	0.00851431	STIGRQLAQQLNMEF	0	-0.35	AroK
1	200	0.517614	0.00829795	AFLCEVQQGGIFSIA	-1	1.11	SecB
1	147	0.503258	0.00730199	APVVAPAPAPAPEVQ	-1	0.44	proOmpA
1	203	0.500552	0.00711425	SIAGIEGTQMAHCLG	-0.7	0.53	SecB
1	123	0.500246	0.00709307	TAKLGYPITDDLDIY	-2	-0.13	proOmpA
1	108	0.498935	0.00700206	DTGFINNNGPTHENQ	-1.7	-1.61	proOmpA
1	253	0.492516	0.00655674	PLYEEIADVTIRTDD	-4	-0.5	AroK
1	135	0.483308	0.00591795	EYAITPEIATRLEYQ	-2	-0.51	proOmpA
1	132	0.481913	0.00582121	DTGVSPVFAGGVEYA	-2	0.43	proOmpA
1	247	0.481253	0.00577542	KKRPLLHVETPPREV	2.3	-1.1	AroK
1	205	0.472013	0.00513435	QMAHCLGAYCPNILF	0.3	0.79	SecB
1	199	0.471641	0.00510859	GEETAFLCEVQQGGI	-3	0.01	SecB
1	201	0.469867	0.00498552	EVQQGGIFSIAGIEG	-2	0.39	SecB
2	69	-0.165139	0.00394614	YVAFIPEKELGIVML	-1	1.15	AmpC
1	217	0.454373	0.00391057	LQQQAGEGTEEHQDA	-3.7	-1.69	SecB
2	68	-0.180815	0.00314372	GGFGSYVAFIPEKEL	-1	0.27	AmpC
1	249	0.436906	0.00269882	ETPPREVLEALANER	-2	-1	AroK
1	252	0.43047	0.00225236	NERNPLYEEIADVTI	-3	-0.69	AroK
1	248	0.420396	0.00155347	LLHVETPPREVLEAL	-1.7	0.22	AroK
1	250	0.411651	0.000946734	REVLEALANERNPLY	-1	-0.68	AroK
1	251	0.40359	0.000387509	EALANERNPLYEEIA	-3	-0.73	AroK
1	223	0.401626	0.00025128	RQLAQQLNMEFYDSD	-2	-1.13	AroK
1	204	0.399077	7.44108e-05	IEGTQMAHCLGAYCP	-0.7	0.28	SecB
1	224	0.398004	0	QQLNMEFYDSDQEIE	-5	-1.37	AroK
2	163	-0.242232	0	VIELQGIAGTSAARE	-1	0.34	RbsA
